# Supplementary material for: In situ synthesis of metal embedded nitrogen doped carbon nanotubes as an electrocatalyst for the oxygen reduction reaction with high activity and stability
Source: Royal Society of Chemistry journal article supplement (doi:10.1039/c8ra03139h), 2018-01-01
Supplement: c8ra03139h1.pdf [file c8ra03139h1.pdf]

## Supporting information

# In Situ Synthesis of Metal Embedded Nitrogen doped Carbon Nanotubes as an Electrocatalyst for oxygen reduction reaction with High Activity and Stability

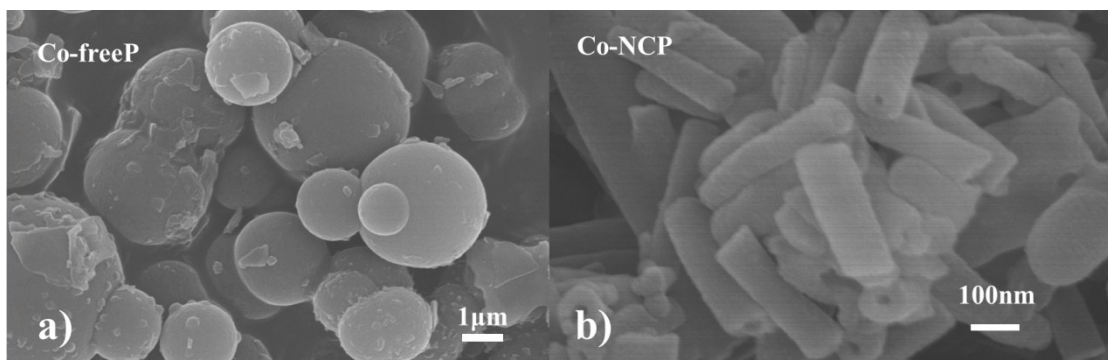

Fig—S1. a) SEM image of Co-freeP, b) SEM image of Co-NCP.

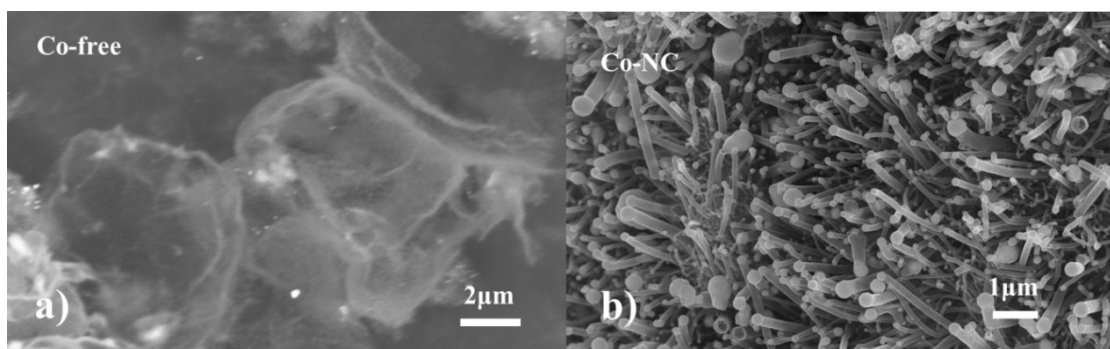

Fig—S2. a) SEM image of Co-free, b) SEM image of Co-NC.

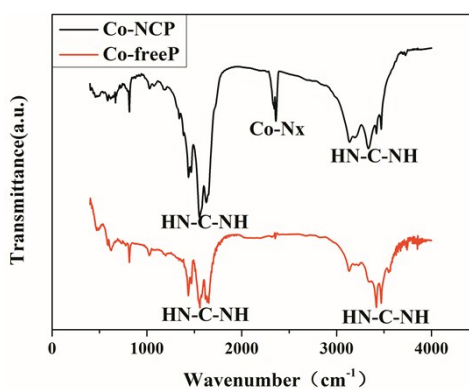

Figure S3. IR atlas of Co-freeP and Co-NCP.

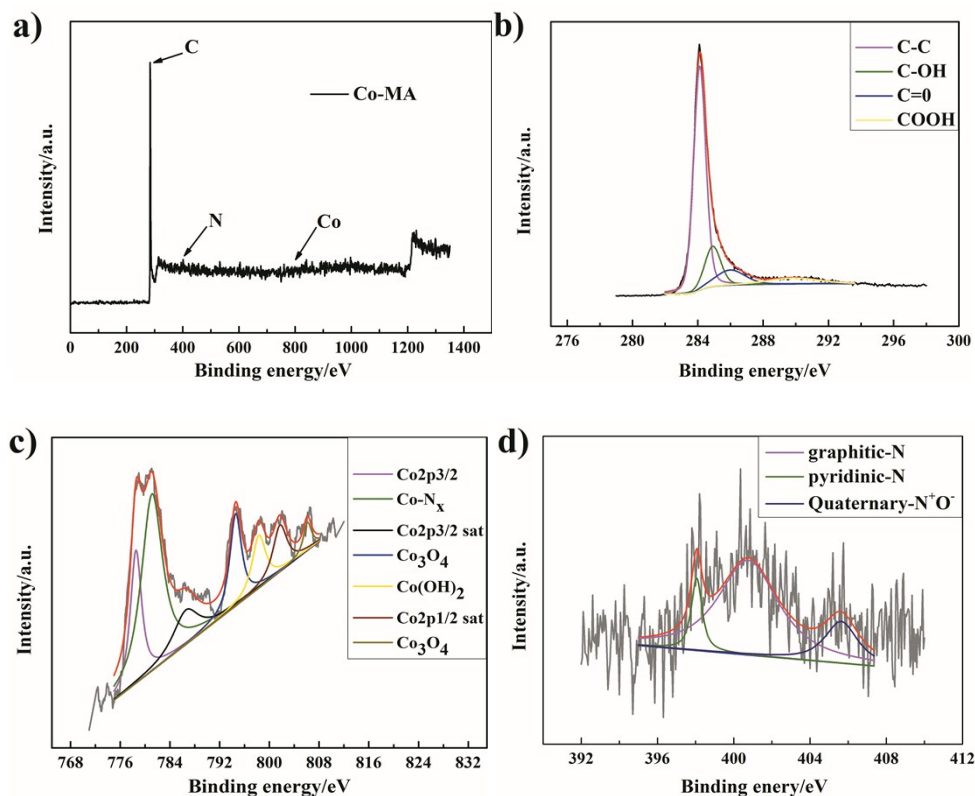

**Figure 4S—**a) XPS survey of Co-MA, b) the deconvoluted high-resolution C1s spectrum of Co-MA, c) the deconvoluted high-resolution Co2p spectrum of Co-MA, d) the deconvoluted high-resolution N1s spectrum of Co-MA.

| Sample | Pyridinic N | Graphitic N | Quaternary-N <sup>+</sup> O <sup>-</sup> | Co-N <sub>x</sub> |
|--------|-------------|-------------|------------------------------------------|-------------------|
| Co-NC  | 48.1%       | 43.1%       | 6.9%                                     | 1.9%              |
| Co-MA  | 10%         | 72.3%       | 17.7%                                    | ~                 |

**Table 1—**The content of different N species in Co-NC and CoMA

| Sample | Surface Area<br>(m <sup>2</sup> g <sup>-1</sup> ) | Pore size<br>(nm) | Pore Volume<br>(cm <sup>3</sup> g <sup>-1</sup> ) |
|--------|---------------------------------------------------|-------------------|---------------------------------------------------|
| Co-NC  | 116.57                                            | 207.30            | 0.83                                              |
| Co-MA  | 115.95                                            | 134.23            | 0.44                                              |

**Table 2—**Comparison of surface area and pore structure of Co-NC and Co-MA materials.

| Sample                                  | $E_0$ (V vs. Ag/AgCl) | $E_{1/2}$ (V vs. Ag/AgCl) | $J_{\text{limit}}$ (mA cm <sup>-2</sup> ) | n       | Ref.      |
|-----------------------------------------|-----------------------|---------------------------|-------------------------------------------|---------|-----------|
| Co-NC                                   | -0.13                 | -0.19                     | 5.44                                      | 4       | This work |
| Co-MA                                   | -0.17                 | -0.25                     | 4.63                                      | 3.5     | This work |
| Co@Co <sub>3</sub> O <sub>4</sub> @C-CM | -0.04                 | -0.16                     | 4.55                                      | 3.8-3.9 | [1]       |
| Fe-N-C                                  | -0.02                 | -0.19                     | 3.55                                      | 3.6-3.9 | [2]       |
| Ag/NC                                   | -0.12                 | -0.20                     | 5.20                                      | 3.98    | [3]       |
| Co@NSCNTs                               | -0.07                 | -0.17                     | 4.90                                      | 3.94    | [4]       |
| Co-NHPC                                 | --                    | -0.13                     | 5.20                                      | 3.87    | [5]       |
| Pt/C                                    | -0.01                 | 0.10                      | 4.88                                      | 3.9     | This work |

**Table 3—Some of M/N/C catalysts and Pt/C ORR activity summary**

#### REFERENCE

- 1 W. Xia, R. Zou, L. An, D. Xia and S. Guo, *Energy & Environmental Science*, 2015, 8, 568-576.
- 2 P. Sivakumar, P. Subramanian, T. Maiyalagan, N. Perkas, A. Gedanken and A. Schechter, *Journal of The Electrochemical Society*, 2017, 164, F781-F789.
- 3 Y. Wang, Y. Qiao, Y. Chen, T. Hu and L. Zhang, *International Journal of Hydrogen Energy*, 2017, 42, 22903-22908.
- 4 L. Zhong, Y. Hu, L. N. Cleemann, C. Pan, J. Sværke, J. O. Jensen and Q. Li, *International Journal of Hydrogen Energy*, 2017, 42, 22887-22896.
- 5 M. Dou, D. He, W. Shao, H. Liu, F. Wang and L. Dai, *Chemistry*, 2016, 22, 2896-2901
